# Supplementary material for: Dapagliflozin Mitigates Hypotension in Lipopolysaccharide-Induced Acute Inflammation Independent of Glycemia Level
Source: MDPI journal article supplement (doi:10.3390/pharmaceutics15061683), 2023-06-08

**Supporting Information File to:**

**Dapagliflozin Mitigates Hypotension in**

**Lipopolysaccharide-Induced Acute Inflammation Independent**

**of Glycemia Level**

**Supplementary Table S1 contains supplementary raw data to Figure 6D, E.**

Expression of iNOS relative to  $\beta$ -actin and respective *p*-value

|                 | Expression of iNOS relative to $\beta$ -actin                                                                |          |          |          |          |                                                                                                                |          |          |          |          |
|-----------------|--------------------------------------------------------------------------------------------------------------|----------|----------|----------|----------|----------------------------------------------------------------------------------------------------------------|----------|----------|----------|----------|
|                 | Normal                                                                                                       |          |          |          |          | Diabetic                                                                                                       |          |          |          |          |
| Groups          | N1                                                                                                           | N2       | N3       | N4       | N5       | N1                                                                                                             | N2       | N3       | N4       | N5       |
| Vehicle         | 0.347646                                                                                                     | 0.218546 | 0.404715 | 0.279796 | 0.229285 | 0.265847                                                                                                       | 0.206832 | 0.240439 | 0.262731 | 0.312916 |
| LPS             | 0.673408                                                                                                     | 0.938612 | 0.662284 | 0.720089 | 0.67602  | 0.803036                                                                                                       | 0.818622 | 0.531084 | 0.812203 | 0.914793 |
| DAPA+LPS        | 0.669541                                                                                                     | 0.182536 | 0.486178 | 0.565453 | 0.606609 | 0.279599                                                                                                       | 0.268577 | 0.468614 | 0.239473 | 0.565016 |
| <i>P</i> -value | Normal<br>Vehicle vs. LPS $P < 0.0001$<br>Vehicle vs. DAPA+LPS $P = 0.0463$<br>LPS vs. DAPA+LPS $P = 0.0230$ |          |          |          |          | Diabetic<br>Vehicle vs. LPS $P < 0.0001$<br>Vehicle vs. DAPA+LPS $P = 0.4039$<br>LPS vs. DAPA+LPS $P = 0.0001$ |          |          |          |          |

**Supplementary Table S1 contains supplementary raw data to Figure 6D, F.**

Expression of  $\alpha$ -SMA relative to  $\beta$ -actin and respective *p*-value

|                 | Expression of $\alpha$ -SMA relative to $\beta$ -actin                                                       |              |              |              |              |              |                                                                                                                |              |          |              |          |              |
|-----------------|--------------------------------------------------------------------------------------------------------------|--------------|--------------|--------------|--------------|--------------|----------------------------------------------------------------------------------------------------------------|--------------|----------|--------------|----------|--------------|
|                 | Normal                                                                                                       |              |              |              |              |              | Diabetic                                                                                                       |              |          |              |          |              |
| Groups          | N1                                                                                                           | N2           | N3           | N4           | N5           | N6           | N1                                                                                                             | N2           | N3       | N4           | N5       | N6           |
| Vehicle         | 0.55274                                                                                                      | 0.6433<br>87 | 0.70318<br>1 | 0.6065<br>01 | 0.7621<br>12 | 0.84300<br>6 | 0.54366<br>3                                                                                                   | 0.49937<br>7 | 1.04536  | 0.93222<br>1 | 0.506979 | 1.0657<br>77 |
| LPS             | 0.11841<br>8                                                                                                 | 0.1204<br>64 | 0.43806<br>7 | 0.0724<br>67 | 0.5485<br>48 | 0.18695<br>9 | 0.33725<br>5                                                                                                   | 0.44738<br>6 | 0.539472 | 0.55680<br>5 | 0.226145 | 0.5348<br>64 |
| DAPA+<br>LPS    | 0.65525<br>4                                                                                                 | 0.7073<br>62 | 0.76779<br>3 | 0.6515<br>7  | 0.7193<br>75 | 0.72506      | 0.66036<br>9                                                                                                   | 0.64907<br>2 | 0.888854 | 0.79299<br>4 | 0.865565 | 0.8914<br>3  |
| <i>P</i> -value | Normal<br>Vehicle vs. LPS $P = 0.0002$<br>Vehicle vs. DAPA+LPS $P = 0.9772$<br>LPS vs. DAPA+LPS $P < 0.0001$ |              |              |              |              |              | Diabetic<br>Vehicle vs. LPS $P = 0.0045$<br>Vehicle vs. DAPA+LPS $P = 0.9593$<br>LPS vs. DAPA+LPS $P = 0.0022$ |              |          |              |          |              |

Uncropped blots shown in Figure 6

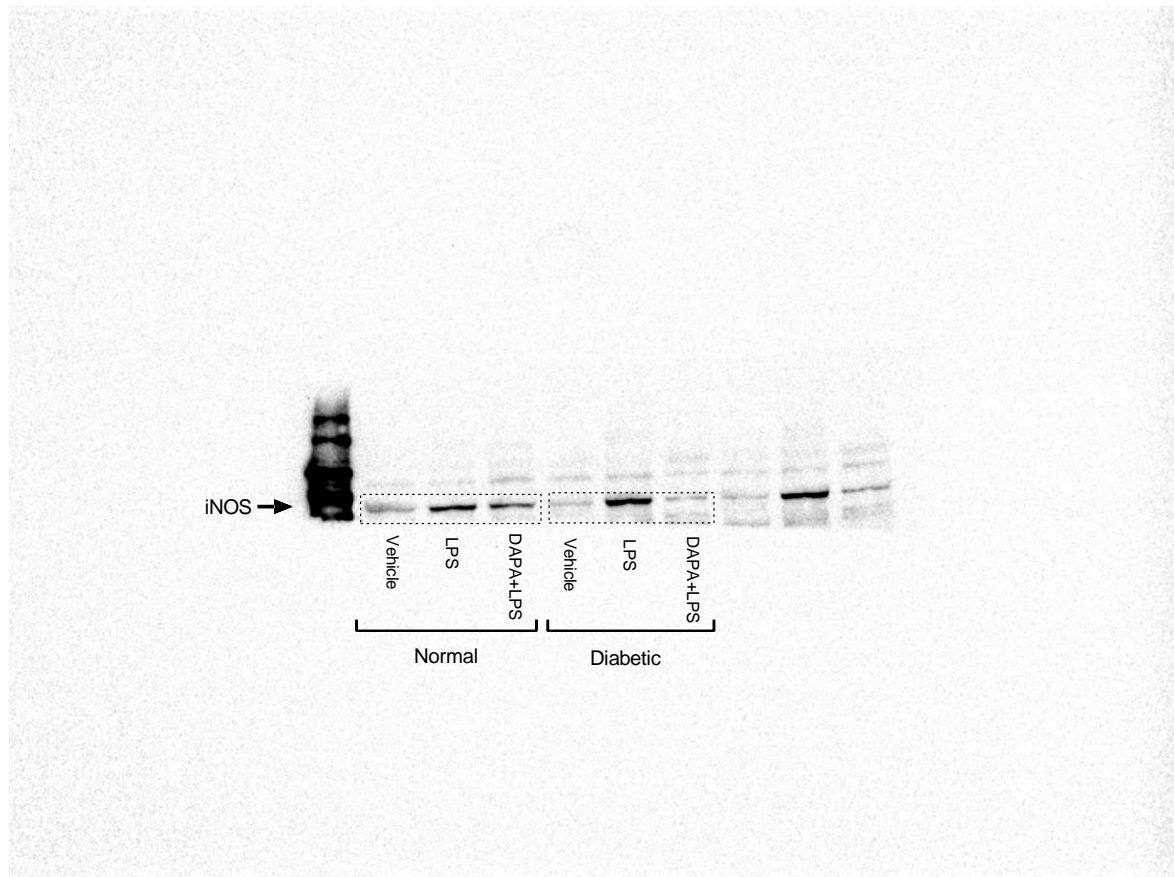

**Uncropped blots shown in Figure 6**

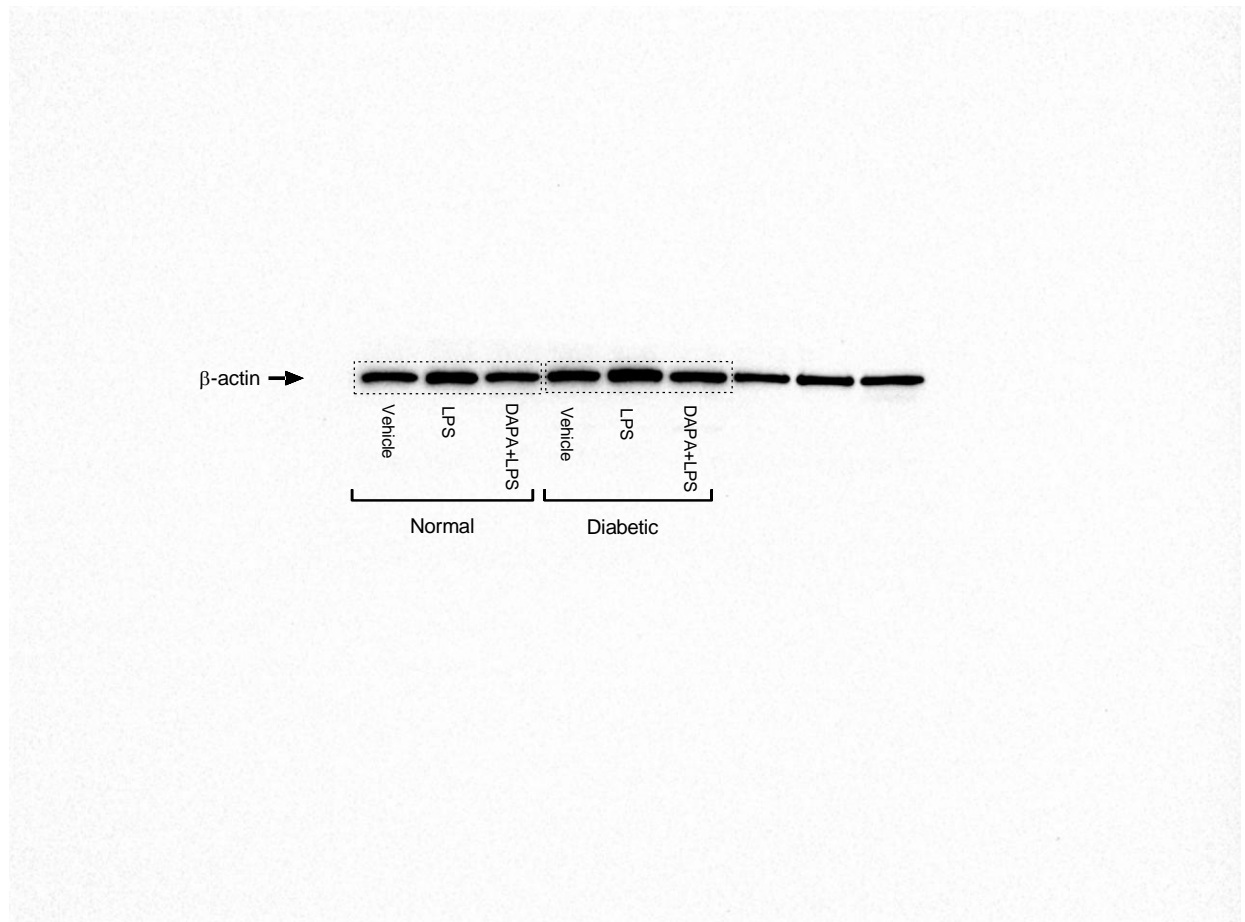

Uncropped blots shown in Figure 6

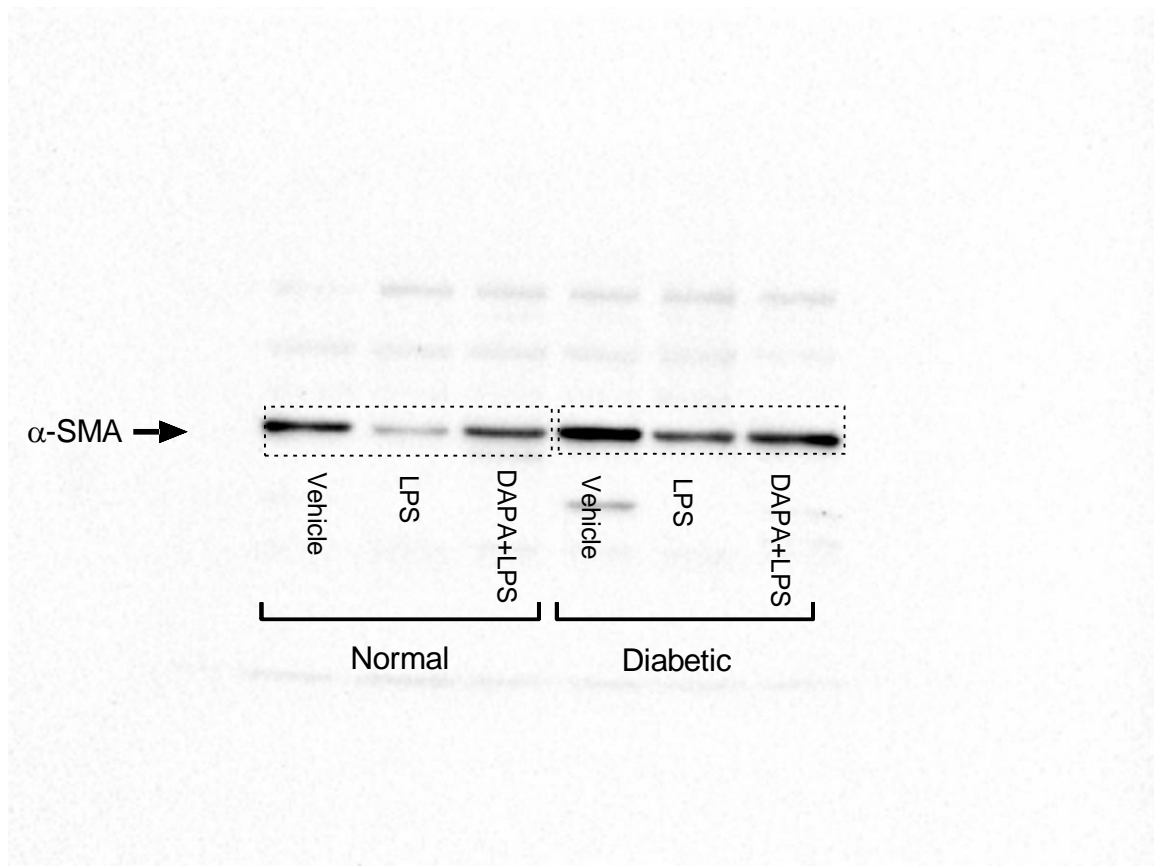

**Uncropped blots shown in Figure 6**

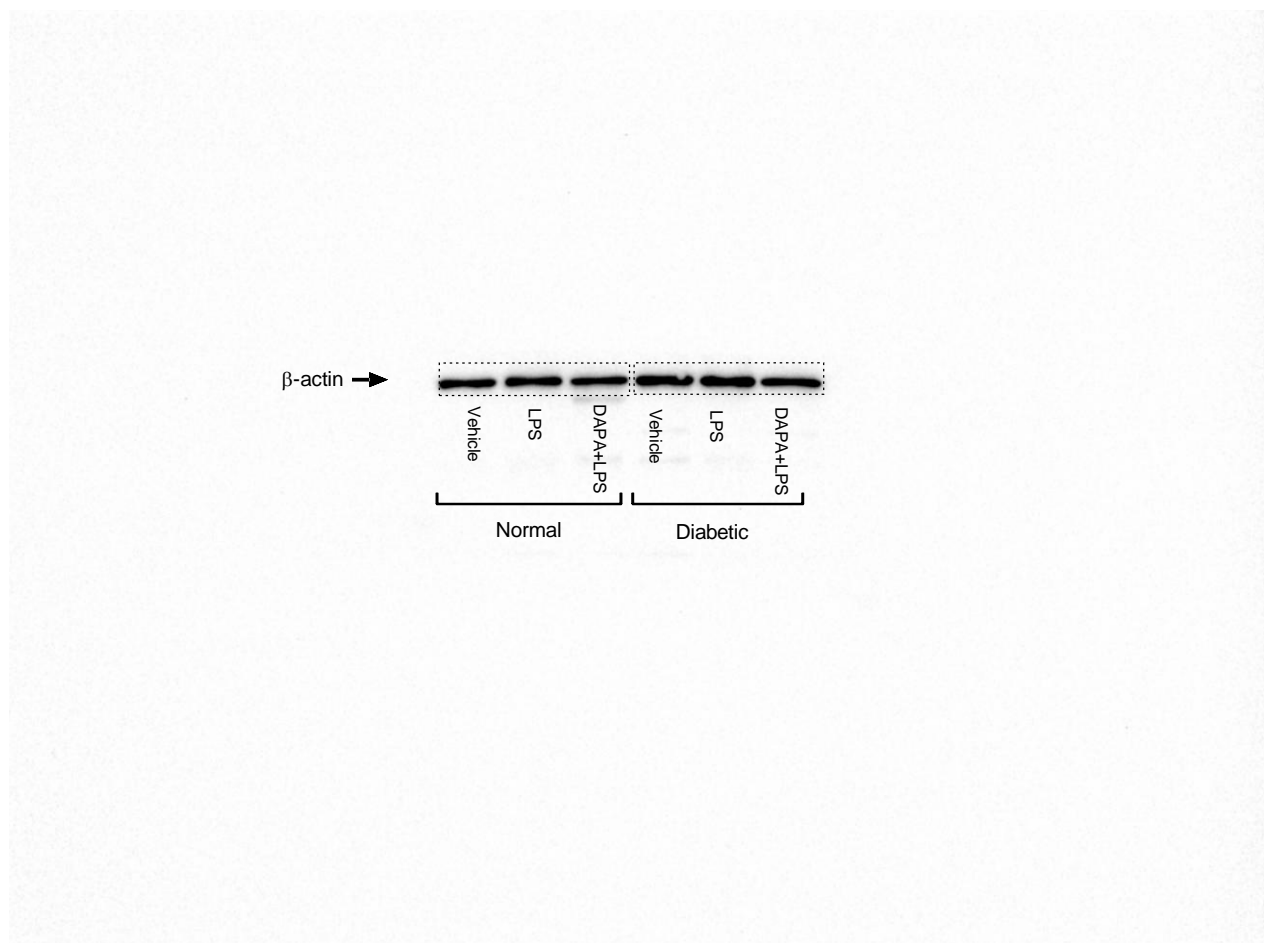

Supplement: s1 [file s1]
